# Supplementary material for: Contribution of single particle inductively coupled plasma mass spectrometry and asymmetrical flow field-flow fractionation for the characterization of silver nanosuspensions. Comparison with other sizing techniques
Source: Royal Society of Chemistry journal article supplement (doi:10.1039/c7ja00160f), 2017-01-01
Supplement: c7ja00160f1.pdf [file c7ja00160f1.pdf]

## Supporting information

### Contribution of single particle inductively coupled plasma mass spectrometry and asymmetrical flow field flow fractionation to the characterization of silver nano-suspensions. Comparison with other sizing techniques.

S. Motellier\*, N. Pelissier, J.G. Mattei

**Table S-1:** ICP-MS experimental conditions

|                                                        |                           |
|--------------------------------------------------------|---------------------------|
| <b>RF power (W)</b>                                    | 1550                      |
| <b>Plasma gas (Ar) flow rate (L min<sup>-1</sup>)</b>  | 15                        |
| <b>Carrier gas (Ar) flow rate (L min<sup>-1</sup>)</b> | 1.15                      |
| <b>Sampling depth (mm)</b>                             | 7.5                       |
| <b>Integration time / mass (s)</b>                     | 0.003 (sp mode) or 1(AF4) |

**Table S-2:** AF4 method

|                                             |                                                                                                                                    |
|---------------------------------------------|------------------------------------------------------------------------------------------------------------------------------------|
| <b>Detector flow (mL min<sup>-1</sup>)</b>  | 1                                                                                                                                  |
| <b>Injection flow (mL min<sup>-1</sup>)</b> | 0.2                                                                                                                                |
| <b>Focus flow (L min<sup>-1</sup>)</b>      | 0.5                                                                                                                                |
| <b>Injection time (min)</b>                 | 5                                                                                                                                  |
| <b>Elution</b>                              | Constant cross flow 1mL min <sup>-1</sup> during 1 min, then exponential crossflow decrease to 0.1 mL min <sup>-1</sup> for 20 min |

**Table S-3:** Comparison of the particle diameters as determined by the different techniques.

Definitions of diameters in Table 1. All values in nm.

|                                 | <b>Ag AL 20nm</b>  | <b>Ag AL 60nm</b>  | <b>Ag AL 100nm</b>  | <b>Ag Citrate</b>  | <b>Ag PEG</b>       |
|---------------------------------|--------------------|--------------------|---------------------|--------------------|---------------------|
| <b>TEM</b>                      | 21.9 ± 2.4 (n=102) | 60.9 ± 4.8 (n=103) | 102.4 ± 7.6 (n=102) | 18.1 ± 8.4 (n=452) | 19.0 ± 7.5 (n=1134) |
| <b>D<sub>area</sub></b>         |                    |                    |                     |                    |                     |
| <b>DLS</b>                      | 35.4 ± 1.8         | 73.2 ± 0.5         | 126.3 ± 3.1         | 37.5 ± 1.5         | 65.3 ± 2.2          |
| <b>D<sub>h</sub></b>            |                    |                    |                     |                    |                     |
| <b>sp-ICP-MS</b>                | 20.3 ± 0.5         | 54.2 ± 0.6         | 96.6 ± 4.6          | 31.1 ± 1.3         | 30.3 ± 0.7          |
| <b>D<sub>mass</sub> average</b> |                    |                    |                     |                    |                     |
| <b>sp-ICP-MS</b>                | 19.0 ± 1.4         | 55.5 ± 0.7         | 93.0 ± 1.4          | 24.0 ± 2.8         | 25.0 ± 1.4          |
| <b>D<sub>mass</sub> mode</b>    |                    |                    |                     |                    |                     |
| <b>AF4-ICP-MS</b>               | 27.4 ± 1.4         | 74.5 ± 1.5         | 107.5 ± 2.5         | 34.1 ± 1.2         | 45.3 ± 1.9          |
| <b>D<sub>t</sub> average</b>    |                    |                    |                     |                    |                     |
| <b>AF4-ICP-MS</b>               | 20.1 ± 1.3         | 59.0 ± 1.4         | 80.8 ± 1.3          | 25.2 ± 1.4         | 44.4 ± 1.7          |
| <b>D<sub>t</sub> mode</b>       |                    |                    |                     |                    |                     |
| <b>AF4-MALLS</b>                | 32 ± 14            | 44 ± 7             | 68 ± 17             |                    |                     |
| <b>D<sub>rms</sub></b>          |                    |                    |                     |                    |                     |

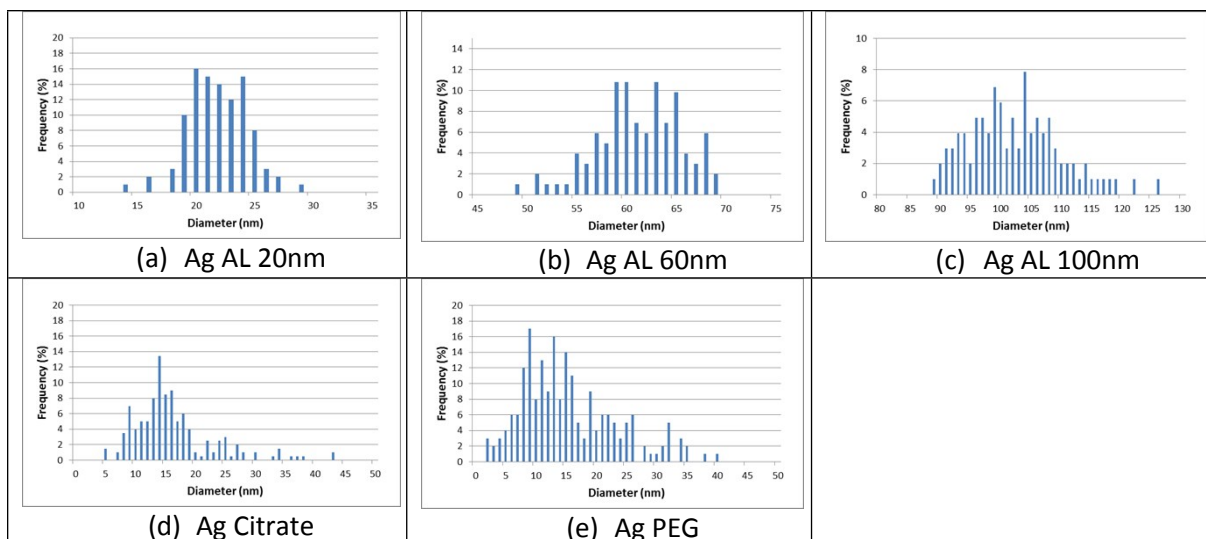

**Fig. S-1:** Size distributions (in number) determined by TEM. (a) Ag AL 20nm, (b) Ag AL 60nm, (c) Ag AL 100nm, (d) Ag Citrate, and (e) Ag PEG.

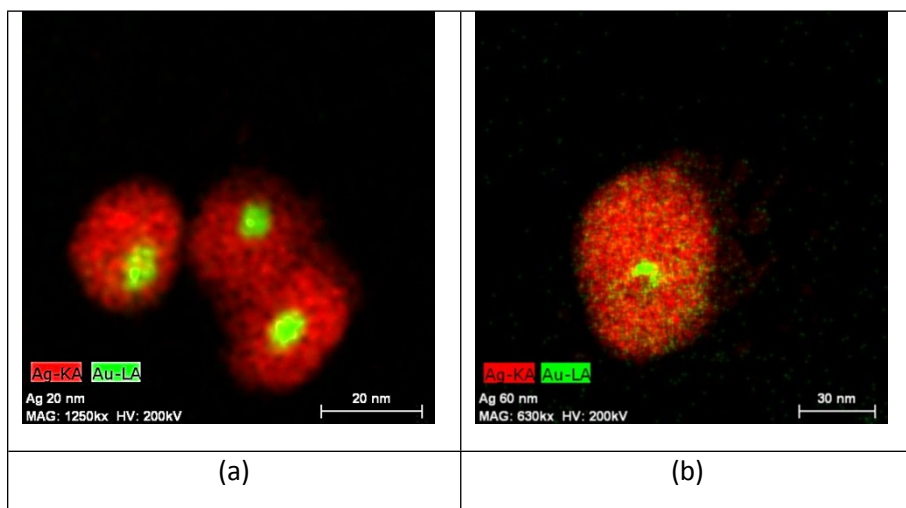

**Fig. S-2:** EDS element maps of Ag AL NPs. (a) Ag AL 20nm, (b) Ag AL 60nm. Ag in red and Au in green.

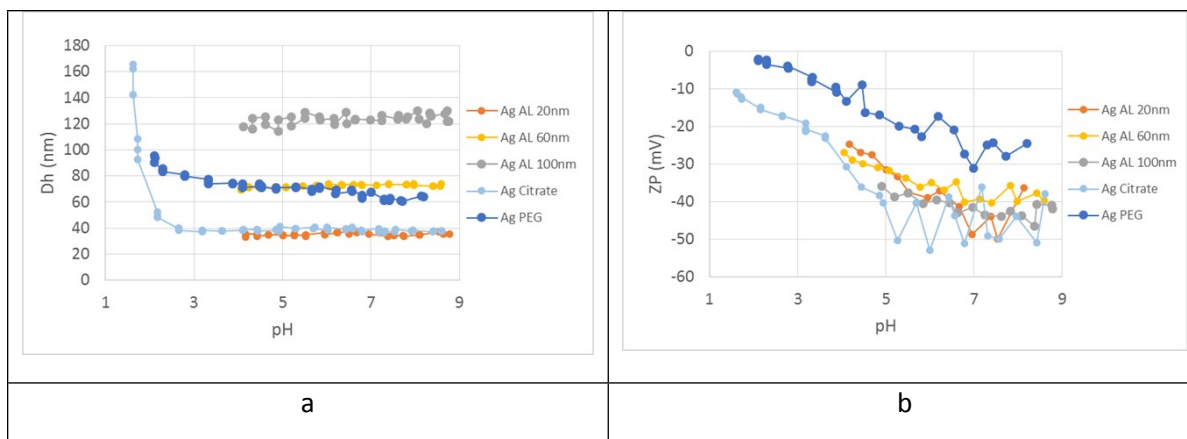

**Fig. S-3:** Evolution of (a) the z-averaged hydrodynamic diameter ( $D_h$ ) and (b) the zeta potential (ZP) as a function of pH for Ag NPs in suspension. Experimental conditions: [Ag NPs] = 4 mg L<sup>-1</sup> in NaNO<sub>3</sub> 1 mM, pH scan in decreasing pH order.

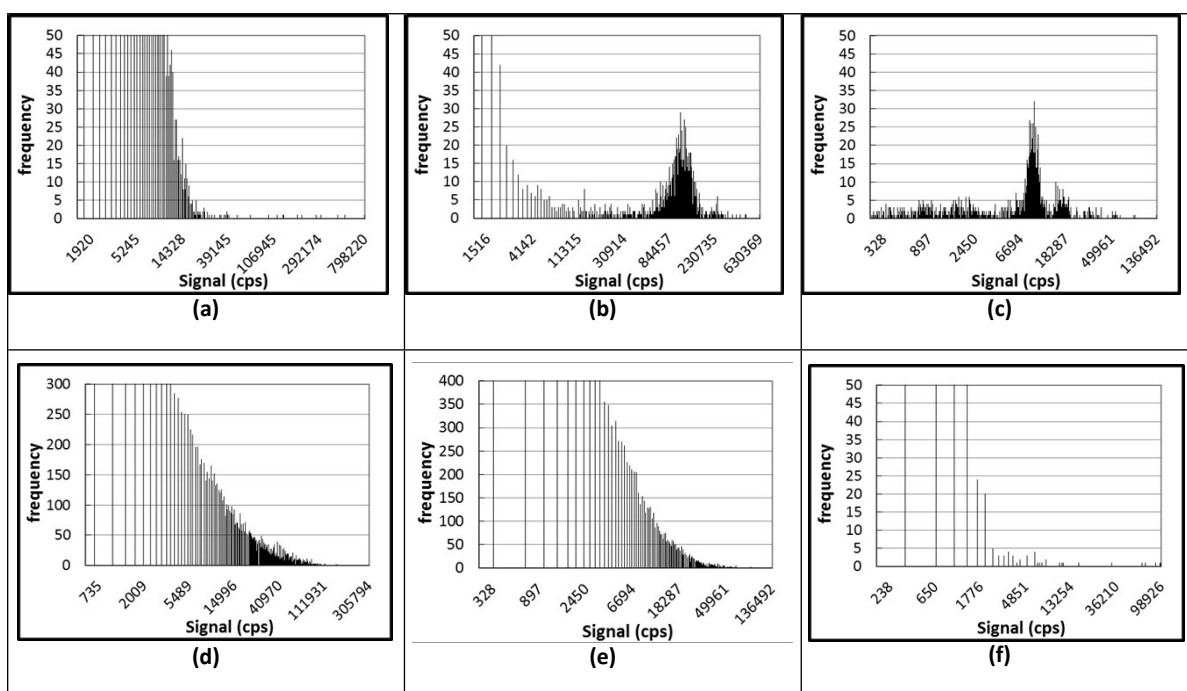

**Fig. S-4:** spICP-MS intensity histograms for (a) Ag AL 20 nm, (b) Ag AL 60 nm, (c) Ag AL 100 nm, (d) Ag Citrate, and (e) Ag PEG. (f): histogram showing the background signal for UP water. Sample concentration: 50 ng L<sup>-1</sup> (Ag AL 20nm and Ag PEG); 125 ng L<sup>-1</sup> (Ag AL 60nm and Ag Citrate), and 4  $\mu$ g L<sup>-1</sup> (Ag AL 100nm) in UP water.

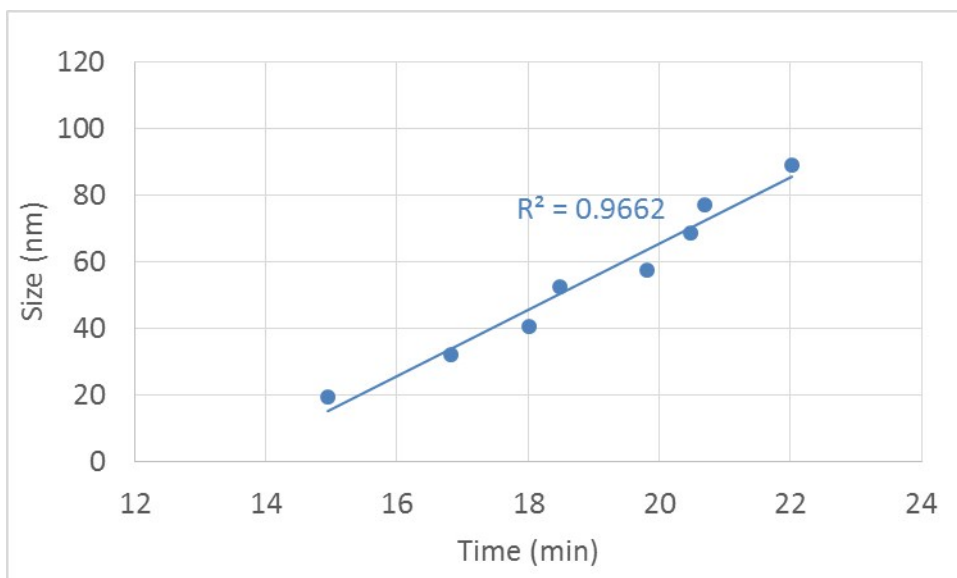

**Fig. S-5:** Size calibration of the elution time in AF4 analyses. Elution time at the peak maximum. The size corresponds to the TEM diameter (provided by the supplier) of the Ag NPs.
